# Supplementary material for: Targeted Delivery of C/EBPα-saRNA by RNA Aptamers Shows Anti-tumor Effects in a Mouse Model of Advanced PDAC
Source: PubMed Central journal article supplement — Mol Ther Nucleic Acids. 2019 Aug 22;18:142–54. doi: 10.1016/j.omtn.2019.08.017 (PMC6796740; doi:10.1016/j.omtn.2019.08.017), 2019-08-22
Supplement: mmc1.pdf [file mmc1.pdf]

OMTN, Volume 18

## Supplemental Information

### **Targeted Delivery of C/EBP $\alpha$ -saRNA by RNA Aptamers Shows Anti-tumor Effects in a Mouse Model of Advanced PDAC**

**Sorah Yoon, Kai-Wen Huang, Pinelopi Andrikakou, Daniel Vasconcelos, Piotr Swiderski, Vikash Reebye, Mikael Sodergren, Nagy Habib, and John J. Rossi**

## Supplementary Figure S1

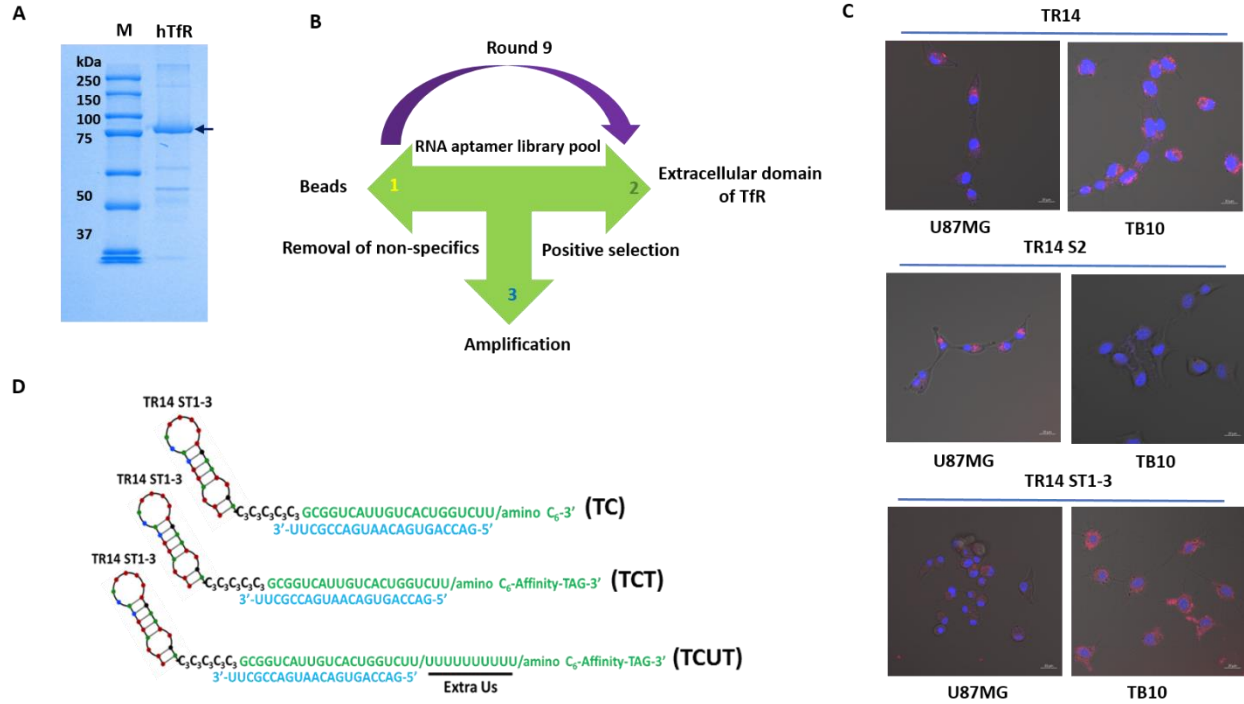

**Supplementary Figure S1. Ectodomain SELEX, cross-activity and constructs of albumin affinity tag** (a) The extracellular domain of hTfR protein tagged with His6 was visualized using 10% SDS-PAGE and Coomassie stain; arrow indicates the protein at the expected size. M; marker, hTfR; human transferrin receptor (10  $\mu$ g/lane) (b) An RNA aptamer library pool was incubated with agarose beads to remove non-specific binders (1). The supernatant was incubated with His6-hTfR for positive selection (2). After extraction of binders to hTfR, RNA aptamers were amplified by PCR and *in vitro* transcription (3). After 9 rounds of SELEX, the aptamer sequence was identified. (c) Cross-activity of TR14 and its truncates on TfR1 and TfR2 on selectively expressed on glioblastoma cell line; U87MG and TB10. Red: Cy3-labeled RNAs; blue: Hoechst 33342 for nuclei. Scale bar: 10  $\mu$ m. (d) Illustration of three TR14 ST1-3 conjugates without (TC) or with (TCT, TCUT) an albumin affinity tag at the 3' end, in which the relative position of different modules can be seen.

**Supplementary Table S1. The frequency of RNA aptamers**

| Name | Sequence                                                                                          | Frequency (%) |
|------|---------------------------------------------------------------------------------------------------|---------------|
| TR14 | 5'-GGGAGACAAGAAUAAACGCUCAAUGCGUUCACGUUUAUUCACAU<br>UUUUGAAUUGAGCAUGAGCUUCGACAGGAGGCUCACAACAGGC-3' | 9/25 (36%)    |
